# Supplementary material for: Identification of Mutation Regions on NF1 Responsible for High- and Low-Risk Development of Optic Pathway Glioma in Neurofibromatosis Type I
Source: Front Genet. 2018 Jul 24;9:270. doi: 10.3389/fgene.2018.00270 (PMC6066643; doi:10.3389/fgene.2018.00270)
Supplement: Supplementary file 1 [file Table_1.XLSX]

## Sheet: 补充材料
Table S1. Detailed information about included patients.
Number	Reference PMID	Original number	Gender	Age of last review	Methods of genetic testing	Mutation type	Exon	DNA changes	Predicted amino acid alterations	OPG diagnosis	NIH diagnostic criteria
1	PMC1051455	96-21	female	7	Sanger	Missense mutation	13	c.1513A>G	p.Lys505Glu	OPG	Y
2	PMC1051455	96-42	male	4	Sanger	Splice site mutation	43	c.6641+1G>T		OPG	Y
3	23906300	P63	?	3	Sanger	Frameshift mutation	3	c.240_241delTC	p.Gln83Valfs*23	OPG	Y
4	23906300	P46	?	14	Sanger	Splice site mutation	4	c.479+5G>A		OPG	Y
5	23906300	P103	?	14	Sanger	Frameshift mutation	5	c.483delA	p.Leu161Phefs*4	OPG	Y
6	23906300	P12	?	9	Sanger	Frameshift mutation	5	c.499_502delTGTT	p.Cys167Glnfs*10	OPG	Y
7	23906300	P58a	?	14	Sanger	Frameshift mutation	7	c.725delT	p.Met242Argfs*39	OPG	Y
8	23906300	P68	?	7	Sanger	Missense mutation	9	c.989C>T	p.Ala330Val	OPG	Y
9	23906300	P18	?	6	Sanger	Frameshift mutation	9	c.998_999insA	p.Tyr333Ter	OPG	Y
10	23906300	P18b	?	4	Sanger	Frameshift mutation	9	c.998_999insA	p.Tyr333Ter	OPG	Y
11	23906300	P122	?	19	Sanger	Nonsense mutation	9	c.910C>T	p.Arg304Ter	OPG	Y
12	23906300	P37a	?	21	Sanger	Frameshift mutation	13	c.1497_1498insA	p.Ile500Asnfs*11	OPG	Y
13	23906300	P37b	?	18	Sanger	Frameshift mutation	13	c.1497_1498insA	p.Ile500Asnfs*11	OPG	Y
14	23906300	P118	?	13	Sanger	Frameshift mutation	16	c.1756_1759delACTA	p.Thr586Valfs*18	OPG	Y
15	23906300	P74	?	10	Sanger	Frameshift mutation	18	c.2129dupT	p.Arg711Profs*5	OPG	Y
16	23906300	P49	?	18	MLPA	Large deletion	19	c.2252_2325del	p.Arg752Leufs*17	OPG	Y
17	23906300	P10	?	7	Sanger	Frameshift mutation	21	c.2546delG	p.Gly849Glufs*29	OPG	Y
18	23906300	P44	?	16	Sanger	Frameshift mutation	21	c.2618_2619insT	p.Lys874Ter	OPG	Y
19	23906300	P2	?	24	Sanger	Missense mutation	21	c.2540T>C	p.Leu847Pro	OPG	Y
20	23906300	P3	?	11.5	Sanger	Nonsense mutation	29	c.3892C>T	p.Gln1298Ter	OPG	Y
21	23906300	P16	?	10	Sanger	Frameshift mutation	29	c.3913delTinsGAA	p.Leu1305Glufs*5	OPG	Y
22	23906300	P23	?	7	MLPA	Large deletion	30-34	c.3975_4661del		OPG	Y
23	23906300	P67	?	12	MLPA	Large deletion	31-35	c.4111_4772del		OPG	Y
24	23906300	P90	?	5	Sanger	Splice site mutation	36	c.5206-5_5220del		OPG	Y
25	23906300	P89	?	7	Sanger	Frameshift mutation	42	c.6526_6527delTT	p.Phe2176Cysfs*44	OPG	Y
26	23906300	P57	?	8	Sanger	Inframe mutation	47	c.7096_7101delAACTTT	p.Asn2366_Phe2367del	OPG	Y
27	23906300	P11	?	13	MLPA	Whole gene deletion		Whole gene deletion		OPG	Y
28	23906300	P38	?	15	Sanger	Splice site mutation	34	c.4662-2A>G		OPG	Y
29	26345759	4	male	2	Sanger	Frameshift mutation	24	c.3193_3194insA	p.Thr1065Asnfs*24	OPG	Y
30	26969325	NF1_BL 74	male	9	NGS	Nonsense mutation	5	c.565A>T	p.Lys189Ter	OPG	Y
31	26969325	NF1_BL 100	female	18	NGS	Splice site mutation	7	c.731-1G>A		OPG	Y
32	26969325	NF1_BL 87	female	20	NGS	Splice site mutation	8	c.889-2A>G		OPG	Y
33	26969325	NF1_BL 80	female	10	NGS	Nonsense mutation	9	c.910C>T	p.Arg304Ter	OPG	Y
34	26969325	NF1_BL 89	male	16	NGS	Nonsense mutation	9	c.910C>T	p.Arg304Ter	OPG	Y
35	26969325	NF1_BL 101	female	26	Sanger	Nonsense mutation	11	c.1224T>G	p.Tyr408Ter	OPG	Y
36	26969325	NF1_BL 72	female	18	Sanger	Nonsense mutation	11	c.1246C>T	p.Arg416Ter	OPG	Y
37	26969325	NF1_BL 90	male	11	NGS	Nonsense mutation	12	c.1278G>A	p.Trp426Ter	OPG	Y
38	26969325	NF1_BL 69	female	9	NGS	Nonsense mutation	12	c.1381C>T	p.Arg461Ter	OPG	Y
39	26969325	NF1_BL 77	female	9	NGS	Nonsense mutation	12	c.1381C>T	p.Arg461Ter	OPG	Y
40	26969325	NF1_BL 79	male	11	Sanger	Missense mutation	13	c.1466A>G	p.Tyr489Cys	OPG	Y
41	26969325	NF1_BL 97	male	57	Sanger	Splice site mutation	13	c.1527+1G>T		OPG	Y
42	26969325	NF1_BL 104	male	7	Sanger	Splice site mutation	15	c.1721+3A>G		OPG	Y
43	26969325	NF1_BL 91	female	49	Sanger	Frameshift mutation	16	c.1754_1757delTAAC	p.Thr586Valfs*18	OPG	Y
44	26969325	NF1_BL 81	female	17	Sanger	Frameshift mutation	16	c.1782_1783delAG	p.Glu595Asnfs*14	OPG	Y
45	26969325	NF1_BL 103	male	26	Sanger	Splice site mutation	16	c.1842_1845+1delTAAGG		OPG	Y
46	26969325	NF1_BL 67	female	14	Sanger	Nonsense mutation	21	c.2446C>T	p.Arg816Ter	OPG	Y
47	26969325	NF1_BL 66	male	19	NGS	Splice site mutation	22	c.2990+1_2990+2insT		OPG	Y
48	26969325	NF1_BL 68	female	8	NGS	Splice site mutation	23	c.3113+1G>A		OPG	Y
49	26969325	NF1_BL 59	male	12	NGS	Frameshift mutation	26	c.3456_3459delACTC	p.Leu1153Metfs*4	OPG	Y
50	26969325	NF1_BL 88	female	26	NGS	Frameshift mutation	26	c.3456_3459delACTC	p.Leu1153Metfs*4	OPG	Y
51	26969325	NF1_BL 96	male	10	NGS	Frameshift mutation	26	c.3456_3459delACTC	p.Leu1153Metfs*4	OPG	Y
52	26969325	NF1_BL 102	female	25	NGS	Nonsense mutation	27	c.3703C>T	p.Gln1235Ter	OPG	Y
53	26969325	NF1_BL 95	male	17	NGS	Nonsense mutation	28	c.3721C>T	p.Arg1241Ter	OPG	Y
54	26969325	NF1_BL 105	female	15	NGS	Nonsense mutation	29	c.3916C>T	p.Arg1306Ter	OPG	Y
55	26969325	NF1_BL 58	female	13	Sanger	Splice site mutation	31	c.4269+1G>T		OPG	Y
56	26969325	NF1_BL 93	male	10	Sanger	Missense mutation	32	c.4277A>C	p.Gln1426Pro	OPG	Y
57	26969325	NF1_BL 42	male	40	NGS	Nonsense mutation	34	c.4537C>T	p.Arg1513Ter	OPG	Y
58	26969325	NF1_BL 99	male	24	NGS	Frameshift mutation	35	c.4767_4769delACGinsCT	p.Arg1590Ter	OPG	Y
59	26969325	NF1_BL 53	male	21	NGS	Frameshift mutation	36	c.5089_5090delCA	p.Ile1698Argfs*3	OPG	Y
60	26969325	NF1_BL 73	male	11	NGS	Frameshift mutation	36	c.5113_5114delCT	p.Leu1705Thrfs*30	OPG	Y
61	26969325	NF1_BL 75	male	10	NGS	Nonsense mutation	39	c.5839C>T	p.Arg1947X	OPG	Y
62	26969325	NF1_BL 82	female	7	NGS	Nonsense mutation	39	c.5839C>T	p.Arg1947X	OPG	Y
63	26969325	NF1_BL 125	male	45	NGS	Frameshift mutation	45	c.6787_6790delACTT	p.Tyr2264Thrfs*5	OPG	Y
64	26969325	NF1_BL 92	female	16	NGS	Splice site mutation	49	c.7394+2_7394+4delTAA		OPG	Y
65	26969325	NF1_BL 131	female	27	NGS	Nonsense mutation	50	c.7528C>T	p.Gln2510X	OPG	Y
66	26969325	NF1_BL 70	female	22	NGS	Frameshift mutation	53	c.7881_7882delTG	p.Phe2629Serfs*9	OPG	Y
67	PMC4998908	1	?	?	Sanger	Missense mutation	4	c.434T>C	p.Leu145Pro	OPG	Y
68	PMC4998908	12	?	?	Sanger	Splice site mutation	23	c.3113+1G>A		OPG	Y
69	PMC4998908	17	?	?	Sanger	Frameshift mutation	36	c.4974_4977del	p.Tyr1659Thrfs*17	OPG	Y
70	28955729	1	female	?	?	Nonsense mutation	10	c.1149C>A	p.Cys383Ter	OPG	Y
71	28955729	2	female	?	?	Frameshift mutation	14	c.1541_1542delAG	p.Gln514Argfs*43	OPG	Y
72	28955729	3	female	?	?	Frameshift mutation	16	c.1756_1759delACTA	p.Thr586Valfs*18	OPG	Y
73	28955729	5	male	?	?	Nonsense mutation	18	c.2041C>T	p.Arg681Ter	OPG	Y
74	28955729	6	male	?	?	Nonsense mutation	18	c.2050C>T	p.Gln684Ter	OPG	Y
75	28955729	7	female	?	?	Frameshift mutation	20	c.2407delC	p.Gln803Argfs*18	OPG	Y
76	28955729	8	female	?	?	Nonsense mutation	21	c.2560C>T	p.Gln854Ter	OPG	Y
77	28955729	9	male	?	?	Frameshift mutation	22	c.2984_2988delTGGTC	p.Leu995Glnfs*24	OPG	Y
78	28955729	11	male	?	?	Nonsense mutation	29	c.3916C>T	p.Arg1306Ter	OPG	Y
79	28955729	12	male	?	?	Nonsense mutation	30	c.4021C>T	p.Gln1341Ter	OPG	Y
80	28955729	14	male	?	?	Nonsense mutation	37	c.5242C>T	p.Arg1748Ter	OPG	Y
81	26666878	1	female	2.5	?	Nonsense mutation	18	c.2041C>T	p.Arg681Ter	OPG	Y
82	17514731	1a	female	4	Sanger	Nonsense mutation	5	c.484C>T	p.Gln162Ter	OPG	NA
83	17514731	1b	female	1.6	Sanger	Nonsense mutation	5	c.484C>T	p.Gln162Ter	OPG	NA
84	26331193	1	female	37	?	Missense mutation	18	c.2084T>C	p.Leu695Pro	OPG	Y
85	28422438	9	?	1	Sanger	Splice site mutation	33	c.4514+1G>A		OPG	Y
86	28422438	10	?	3	Sanger	Nonsense mutation	49	c.7285C>T	p.Arg2429Ter	OPG	Y
87	28422438	11	?	0	Sanger	Frameshift mutation	18	c.2131delC	p.Arg711Alafs*37	OPG	Y
88	26558229	1	male	4	Sanger	Inframe mutation	2	c.177_179delTAC	p.Thr60del	OPG	Y
89	#	1	male	1.67	?	Frameshift mutation	15	c.1719delT	p.Ser574Alafs*12	OPG	Y
90	19665063	1	male	30	Sanger	Splice site mutation	51	c.7675 + 1G > A		OPG	Y
91	16380919	NFNS-1	male	9	Sanger	Missense mutation	5	c.581T>G	p.Leu194Arg	OPG	Y
92	16380919	62c	female	6.5	Sanger	Splice site mutation	15	c.1721+3A>G		OPG	Y
93	16380919	NFNS-11	female	40	Sanger	Missense mutation	32	c.4294G>C	p.Val1432Leu	OPG	Y
94	10494088	1	male	21	Sanger	Nonsense mutation	45	c.6792C>A	p.Tyr2264Ter	OPG	Y
95	9668168	B362	female	31	Sanger	Missense mutation	28	c.3827G>C	p.Arg1276Pro	OPG	Y
96	25324867	2	?	4.9	Sanger	Missense mutation	17	c.1885G>A	p.Gly629Arg	OPG	Y
97	25324867	4	?	6.8	Sanger	Missense mutation	37	c.5255T>C	p.Leu1752Pro	OPG	Y
98	15948193	1	female	14	Sanger	Missense mutation	21	c.2531T>G	p.Leu844Arg	OPG	Y
99	10090487	0842	male	8	Sanger	Frameshift mutation	36	c.5168_5169delTC	p.Leu1723Glnfs*12	OPG	Y
100	28924536	#10	male	7	NGS	Nonsense mutation	39	c.5839C>T	p.Arg1947Ter	OPG	Y
101	PMC1051455	96-62	female	24	Sanger	Splice site mutation	5	c.587-3C>A		Non-OPG	Y
102	PMC1051455	96-65	female	22	Sanger	Frameshift mutation	24	c.3151-3152delGG	p.Gly1051Asnfs*8	Non-OPG	Y
103	23906300	P47	?	36	Sanger	Frameshift mutation	26	c.3457_3460delCTCA	p.Leu1153Metfs*4	Non-OPG	Y
104	23906300	P69	?	22	Sanger	Frameshift mutation	9	c.919_926delCTTGCTGG	p.Leu307Profs*5	Non-OPG	Y
105	23906300	P51	?	22	Sanger	Frameshift mutation	32	c.4325_4329delCTTTC	p.Pro1442Glnfs*2	Non-OPG	Y
106	23906300	P21	?	23	Sanger	Frameshift mutation	47	c.7085delA	p.Asn2362Thrfs*13	Non-OPG	Y
107	23906300	P87	?	37	Sanger	Frameshift mutation	16	c.1756_1759delACTA	p.Thr586Valfs*18	Non-OPG	Y
108	23906300	P76	?	23	Sanger	Frameshift mutation	31	c.4226_4227delAGinsT	p.Lys1409Ilefs*10	Non-OPG	Y
109	23906300	P6	?	47	Sanger	Frameshift mutation	42	c.6483_6484insAC	p.Arg2162Thrfs*18	Non-OPG	Y
110	23906300	P4	?	33	Sanger	Frameshift mutation	30	c.4076_4077insC	p.Gln1360Serfs*14	Non-OPG	Y
111	23906300	P56	?	18	Sanger	Missense mutation	1	c.47G>C	p.Arg16Pro	Non-OPG	Y
112	23906300	P88	?	33	Sanger	Missense mutation	28	c.3827G>A	p.Arg1276Gln	Non-OPG	Y
113	23906300	P41	?	22	Sanger	Missense mutation	36	c.4981T>C	p.Cys1661Arg	Non-OPG	Y
114	23906300	P29	?	20	Sanger	Missense mutation	24	c.3142T>C	p.Trp1048Arg	Non-OPG	Y
115	23906300	P32	?	21	MLPA	Whole gene deletion		Whole gene deletion		Non-OPG	Y
116	23906300	P64	?	14	Sanger	Splice site mutation	2	c.204+2T>G		Non-OPG	Y
117	26969325	NF1_BL112	male	13	NGS	Nonsense mutation	1	c.55G>T	p.Glu19Ter	Non-OPG	Y
118	26969325	NF1_BL108	male	10	NGS	Frameshift mutation	3	c.263_266delATAC	p.Thr89Trpfs*13	Non-OPG	Y
119	26969325	NF1_BL142	female	35	NGS	Frameshift mutation	5	c.495_498delTGTT	p.Cys167Glnfs*10	Non-OPG	Y
120	26969325	NF1_BL140	female	24	NGS	Frameshift mutation	7	c.725delT	p.Met242Argfs*39	Non-OPG	Y
121	26969325	NF1_BL144	male	20	NGS	Inframe mutation	8	c.817_819delCTC	p.Leu274del	Non-OPG	Y
122	26969325	NF1_BL120	female	27	NGS	Splice site mutation	8	c.889-2A>G		Non-OPG	Y
123	26969325	NF1_BL149	male	33	NGS	Nonsense mutation	9	c.910C>T	p.Arg304Ter	Non-OPG	Y
124	26969325	NF1_BL52	female	18	Sanger	Frameshift mutation	13	c.1440_1441insA	p.Pro481Thrfs*10	Non-OPG	Y
125	26969325	NF1_BL121	male	18	NGS	Frameshift mutation	14	c.1541_1542delAG	p.Gln514Argfs*43	Non-OPG	Y
126	26969325	NF1_BL143	male	46	NGS	Frameshift mutation	14	c.1541_1542delAG	p.Gln514Argfs*43	Non-OPG	Y
127	26969325	NF1_BL145	male	17	Sanger	Frameshift mutation	16	c.1780delA	p.Thr594Glnfs*11	Non-OPG	Y
128	26969325	NF1_BL151	male	61	NGS	Frameshift mutation	17	c.1906_1907delTC	p.Ser636Ter	Non-OPG	Y
129	26969325	NF1_BL154	female	42	NGS	Splice site mutation	21	c.2850+1G>T		Non-OPG	Y
130	26969325	NF1_BL153	female	52	NGS	Splice site mutation	21	c.2851-11_2851-8delTTCT		Non-OPG	Y
131	26969325	NF1_BL138	female	25	Sanger	Splice site mutation	24	c.3198-2A>G		Non-OPG	Y
132	26969325	NF1_BL146	female	10	NGS	Frameshift mutation	26	c.3455_3456insA	p.Leu1153Thrfs*42	Non-OPG	Y
133	26969325	NF1_BL109	female	10	NGS	Frameshift mutation	27	c.3525_3526delAA	p.Arg1176Serfs*18	Non-OPG	Y
134	26969325	NF1_BL147	male	29	NGS	Frameshift mutation	27	c.3591_3594delAGAA	p.Glu1198Glnfs*16	Non-OPG	Y
135	26969325	NF1_BL141	female	39	NGS	Nonsense mutation	29	c.3916C>T	p.Arg1306Ter	Non-OPG	Y
136	26969325	NF1_BL134	female	45	NGS	Missense mutation	31	c.4268A>G	p.Lys1423Arg	Non-OPG	Y
137	26969325	NF1_BL152	female	42	NGS	Nonsense mutation	34	c.4537C>T	p.Arg1513Ter	Non-OPG	Y
138	26969325	NF1_BL156	male	46	NGS	Splice site mutation	37	c.5547-2A>T		Non-OPG	Y
139	26969325	NF1_BL135	female	40	NGS	Splice site mutation	37	c.5547-3T>G		Non-OPG	Y
140	26969325	NF1_BL137	female	14	NGS	Nonsense mutation	39	c.5839C>T	p.Arg1947Ter	Non-OPG	Y
141	26969325	NF1_BL49	male	20	NGS	Nonsense mutation	39	c.5839C>T	p.Arg1947Ter	Non-OPG	Y
142	26969325	NF1_BL148	male	48	NGS	Nonsense mutation	39	c.5904C>A	p.Tyr1968Ter	Non-OPG	Y
143	26969325	NF1_BL116	female	45	NGS	Frameshift mutation	40	c.6037dupA	p.Thr2013Asnfs*26	Non-OPG	Y
144	26969325	NF1_BL117	female	20	NGS	Splice site mutation	41	c.6365-2A>T		Non-OPG	Y
145	26969325	NF1_BL139	male	18	NGS	Splice site mutation	44	c.6757-2A>C		Non-OPG	Y
146	26969325	NF1_BL46	female	29	NGS	Frameshift mutation	46	c.6878delC	p.Leu2294Serfs*4	Non-OPG	Y
147	26969325	NF1_BL113	male	45	NGS	Nonsense mutation	49	c.7337C>G	p.Ser2446Ter	Non-OPG	Y
148	28955729	15	male	≥10	?	Missense mutation	2	c.204G>C	p.Met68Ile	Non-OPG	Y
149	28955729	16	female	≥10	?	Frameshift mutation	5	c.495_498delTGTT	p.Cys167Glnfs*10	Non-OPG	Y
150	28955729	17	female	≥10	?	Frameshift mutation	13	c.1431_1446delTAAAGAAAAACCTACA	p.Phe477Leufs*16	Non-OPG	Y
151	28955729	18	male	≥10	?	Missense mutation	13	c.1466A>G	p.Tyr489Cys	Non-OPG	Y
152	28955729	19	male	≥10	?	Missense mutation	13	c.1466A>G	p.Tyr489Cys	Non-OPG	Y
153	28955729	20	male	≥10	?	Frameshift mutation	14	c.1541_1542delAG	p.Gln514Argfs*43	Non-OPG	Y
154	28955729	21	male	≥10	?	Frameshift mutation	18	c.2027_2028insC	p.Ile679Aspfs*21	Non-OPG	Y
155	28955729	22	female	≥10	?	Missense mutation	18	c.2125T>C	p.Cys709Arg	Non-OPG	Y
156	28955729	23	male	≥10	?	Splice site mutation	19	c.2325+1G>A		Non-OPG	Y
157	28955729	24	female	≥10	?	Frameshift mutation	21	c.2768delT	p.Leu923Glnfs*3	Non-OPG	Y
158	28955729	25	female	≥10	?	Missense mutation	27	c.3497G>T	p.Gly1166Val	Non-OPG	Y
159	28955729	26	male	≥10	?	Nonsense mutation	27	c.3520C>T	p.Gln1174Ter	Non-OPG	Y
160	28955729	27	male	≥10	?	Nonsense mutation	30	c.3977T>A	p.Leu1326Ter	Non-OPG	Y
161	28955729	28	male	≥10	?	Nonsense mutation	30	c.4084C>T	p.Arg1362Ter	Non-OPG	Y
162	28955729	29	male	≥10	?	Nonsense mutation	30	c.4084C>T	p.Arg1362Ter	Non-OPG	Y
163	28955729	30	female	≥10	?	Nonsense mutation	30	c.4084C>T	p.Arg1362Ter	Non-OPG	Y
164	28955729	31	female	≥10	?	Missense mutation	32	c.4330A>G	p.Asn1444Asp	Non-OPG	Y
165	28955729	32	male	≥10	?	Frameshift mutation	37	c.5482delG	p.Asp1828Metfs*14	Non-OPG	Y
166	28955729	33	male	≥10	?	Missense mutation	37	c.5546G>A	p.Arg1849Gln	Non-OPG	Y
167	28955729	34	female	≥10	?	Frameshift mutation	41	c.6125_6129dupTATCT	p.Pro2044Tyrfs*7	Non-OPG	Y
168	28955729	35	male	≥10	?	Nonsense mutation	44	c.6709C>T	p.Arg2237Ter	Non-OPG	Y
169	28955729	36	male	≥10	?	Nonsense mutation	45	c.6792C>A	p.Tyr2264Ter	Non-OPG	Y
170	28955729	37	female	≥10	?	Frameshift mutation	54	c.7943_7944insC	p.Leu2648Phefs*24	Non-OPG	Y
171	23668869	5-7	?	12.4	Sanger	Frameshift mutation	3	c.236delT	p.Leu79Tyrfs*6	Non-OPG	Y
172	23668869	12	?	33	Sanger	Nonsense mutation	9	c.910C>T	p.Arg304Ter	Non-OPG	Y
173	23668869	16	?	30	Sanger	Splice site mutation	10	c.1185+5G>C		Non-OPG	Y
174	23668869	14-20	?	14.9	Sanger	Nonsense mutation	12	c.1318C>T	p.Arg440Ter	Non-OPG	Y
175	23668869	14-21	?	17.1	Sanger	Nonsense mutation	12	c.1318C>T	p.Arg440Ter	Non-OPG	Y
176	23668869	19-26	?	31	Sanger	Missense mutation	16	c.1733T>C	p.Leu578Pro	Non-OPG	Y
177	23668869	31	?	25	Sanger	Frameshift mutation	18	c.2033_2034insC	p.Ile679Aspfs*21	Non-OPG	Y
178	23668869	44	?	36	Sanger	Nonsense mutation	28	c.3826C>T	p.Arg1276Ter	Non-OPG	Y
179	23668869	47	?	12	Sanger	Nonsense mutation	30	c.4084C>T	p.Arg1362Ter	Non-OPG	Y
180	23668869	49	?	21	Sanger	Splice site mutation	31	c.4269+1_+12del12		Non-OPG	Y
181	23668869	51	?	10.1	Sanger	Nonsense mutation	34	c.4537C>T	p.Arg1513Ter	Non-OPG	Y
182	23668869	52	?	13.3	Sanger	Nonsense mutation	34	c.4537C>T	p.Arg1513Ter	Non-OPG	Y
183	23668869	59	?	16.6	Sanger	Splice site mutation	38	c.5749+4_7delAGTA		Non-OPG	Y
184	23668869	62	?	63	Sanger	Frameshift mutation	41	c.6336_6342dupGTGTACT	p.Cys2115Valfs*9	Non-OPG	Y
185	23668869	52-64	?	38	Sanger	Nonsense mutation	42	c.6452C>A	p.Ser2151Ter	Non-OPG	Y
186	23668869	59-75	?	31	Sanger	Nonsense mutation	50	c.7441G>T	p.Gly2481Ter	Non-OPG	Y
187	25480383	1M	female	56	Sanger	Nonsense mutation	6	c.625C>T	p.Gln209Ter	Non-OPG	Y
188	25480383	1D	female	30	Sanger	Nonsense mutation	6	c.625C>T	p.Gln209Ter	Non-OPG	Y
189	25480383	2	female	16	Sanger	Splice site mutation	21	c.2850+1G>T		Non-OPG	Y
190	25480383	3S	male	12	Sanger	Atypical splice mutation	33	c.4402A>G	p.Phe1457Ter	Non-OPG	Y
191	25480383	5	female	21	SNP array	Whole gene deletion		Whole gene deletion		Non-OPG	Y
192	22222937	1	female	28	?	Splice site mutation	40	c.6084 +1G >T.		Non-OPG	Y
193	Our patients	1	male	13	NGS+Sanger	Splice site mutation	11	c.1260+3_1260+4delAA		Non-OPG	Y
194	Our patients	2	male	17	NGS+Sanger	Frameshift mutation	17	c.1877dupT	p.Tyr628Leufs*6	Non-OPG	Y
195	Our patients	3	female	16	NGS+Sanger	Nonsense mutation	44	c.6709C>T	p.Arg2237Ter	Non-OPG	Y
196	Our patients	4	female	12	NGS+Sanger	Splice site mutation	32	IVS32+1G>C		Non-OPG	Y
197	Our patients	5	female	25	MLPA	Whole gene deletion		Whole gene deletion		Non-OPG	Y
198	16380919	NFNS-6b	male	11	Sanger	Inframe mutation	22	c.2970_2972delAAT	p.Met992del	Non-OPG	Y
199	16380919	NFNS-7a	female	18	Sanger	Nonsense mutation	31	c.4243G>T	p.Glu1415Ter	Non-OPG	Y
200	16380919	NFNS-7b	male	13	Sanger	Nonsense mutation	31	c.4243G>T	p.Glu1415Ter	Non-OPG	Y
201	16380919	128	male	10	Sanger	Splice site mutation	43	c.6641+1G>A		Non-OPG	Y
202	16380919	NFNS-15a	male	17.7	Sanger	Frameshift mutation	53	c.7877delG	p.Ser2626Metfs*32	Non-OPG	Y
203	12082509	NF1399	female	25	Sanger	Splice site mutation	25	IVS25-3C>G		Non-OPG	Y
204	9385374	MC	female	51	Sanger	Nonsense mutation	45	c.6792C>A	p.Tyr2264Ter	Non-OPG	Y
205	10076878	II-1	male	33	Sanger	Splice site mutation	8	c.889-2A>G		Non-OPG	Y
206	10076878	II-2	female	32	Sanger	Splice site mutation	8	c.889-2A>G		Non-OPG	Y
207	10076878	II-3	female	30	Sanger	Nonsense mutation	39	c.5839C>T	p.Arg1947Ter	Non-OPG	Y
208	25324867	6	?	11	Sanger	Nonsense mutation	18	c.2041C>T	p.Arg681Ter	Non-OPG	Y
209	25324867	7	?	42	Sanger	Nonsense mutation	47	c.7050C>A	p.Cys2350Ter	Non-OPG	Y
210	20229272	1	male	25	Sanger	Splice site mutation	17	c.2002-14C>G		Non-OPG	Y
211	22294052	1	female	60	Sanger	Missense mutation	13	c.1466A>G	p.Tyr489Cys	Non-OPG	Y
212	23417386	1	male	14	Sanger	Frameshift mutation	4	c.389delA	p.His130Leufs*35	Non-OPG	Y
213	19558618	1	female	70	?	Frameshift mutation	27	c.3516_3517delTC	p.Leu1173Profs*21	Non-OPG	Y
214	10090487	97-001	male	10	Sanger	Nonsense mutation	36	c.4839T>G	p.Tyr1613Ter	Non-OPG	Y
215	10090487	0450	female	22	Sanger	Frameshift mutation	36	c.5055_5056insT	p.Val1686Cysfs*11	Non-OPG	Y
Reference PMID is the code of Pubmed database linked to the original research which the patient participated in; the reference# was not included in Pubmed database, and its detailed information is "Gug, C., Anghel, A., Tamas, L., et al. Neurofibromatosis type 1 molecular testing and clinical presentation of two cases. Analele Ştiinţifice Ale Universităţii Alexandru Ioan Cuza din Iași, Sectiunea I…
